# Supplementary material
Source: HighWire-hosted journal article supplement (https://qdcxjkg.com/highwire/filestream/112858/field_highwire_adjunct_files/1/Figure_2.pdf)

Fig 2

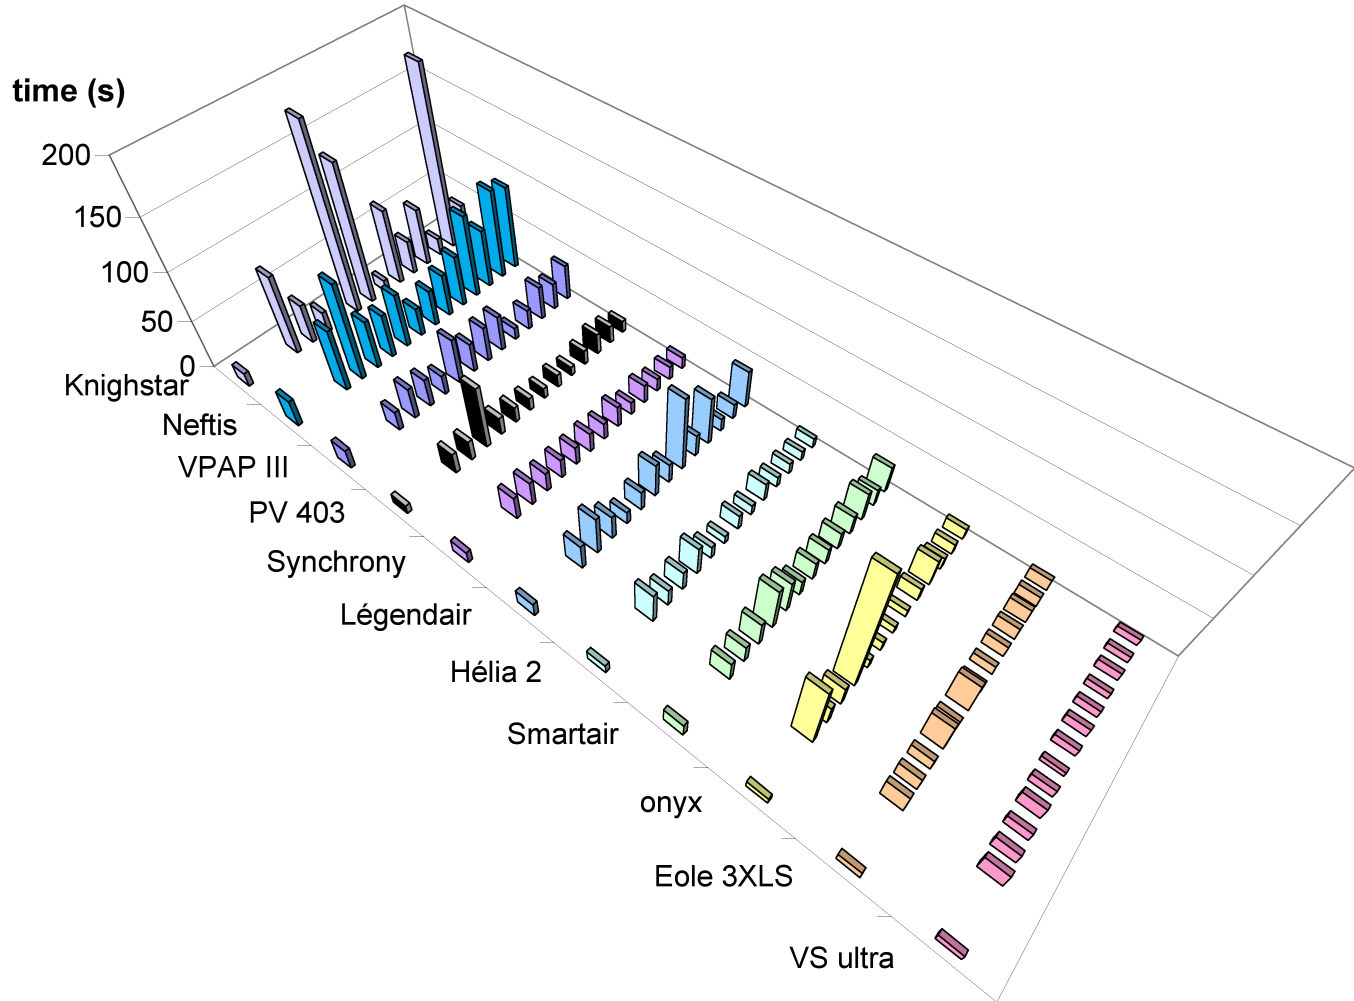

Supplement: Figure_2.pdf [file Figure_2.pdf]
